# Supplementary material for: Synthetic cannabinoid, JWH-030, induces QT prolongation through hERG channel inhibition
Source: Royal Society of Chemistry journal article supplement (doi:10.1039/c6tx00259e), 2016-01-01
Supplement: c6tx00259e4.pdf [file c6tx00259e4.pdf]

## Supplementary Material

**Fig. S1 Effects of JWH-030 and JWH-210 on ventricular systolic pressure (LVSP), left ventricular developed pressure (LVDP), and heart rate of isolated heart.** LVSP, LVDP, and heart rate were measured after treatment with substances at indicated concentration in Langendorff-perfused Sprague-Dawley (SD) rat hearts. Data are means±standard error (SE, n=4). There were no significant differences between groups.

**Fig. S2 JWH-030 prolonged QTcB but had no effects on RR interval.** JWH-030 prolonged QTcB interval but had no effects on RR interval in SD rats compared to basal level. Open arrow indicates the drug injection time. Data are means±standard error (SE, n=4-5). \* $p < 0.05$  vs. -1 (1 minute before treatment). Two-way repeated measures analysis of variance (ANOVA, Bonferroni's test)

**Fig. S3 Effect of E-4031 and JWH-030 on QT interval in rats.** Upper figure shows representative QT interval plot patterns and changes of E-4031 (0.2 mg/kg, i.v.). Middle and lower figures show representative QT interval plot patterns and changes of JWH-030 and vehicle treatment. Red arrows indicate vehicle, JWH-030, and E-4031 treatment time.

**Fig. S4 Effects of JWH-030 beating rate of mice primary cardiomyocytes (DIV 8).** Beating rate was measured for 10 minutes after treatment with substances at indicated concentration. Data are means±standard error (SE, n=26). \*\* $p < 0.01$  vs. 0 (control). JWH-030 reduced beating rate at 100  $\mu$ M. One-way analysis of variance (ANOVA, Bonferroni's test)

**File. S5 Effects of JWH-030 beating rate of mice primary cardiomyocytes (DIV 8).**

**Fig. S6 Pearson correlation analysis of RR and QT intervals in SD rats.** QTcB has no correlation with RR intervals (pearson coefficient 0.00765,  $p=0.357$ ). QT recordings (14,491) from 16 rats were analyzed

**Fig. S7 MRM chromatogram of standards and sample.** (A) A representative chromatogram of standards and standard curve. The standards were prepared using pooled blank serum and spiking solution of JWH-030 at 50, 25, 12.5, 1.25, and 0.625 pg/mL. (B) A representative chromatogram of JWH-030 (0.5 mg/kg) administered sample.
