# Supplementary material for: Synthetic cannabinoid, JWH-030, induces QT prolongation through hERG channel inhibition
Source: Royal Society of Chemistry journal article supplement (doi:10.1039/c6tx00259e), 2016-01-01
Supplement: c6tx00259e9.pdf [file c6tx00259e9.pdf]

Supporting Information 6.

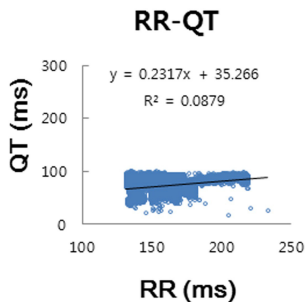

Pearson correlation coefficient 0.296  
 $p < 0.01$

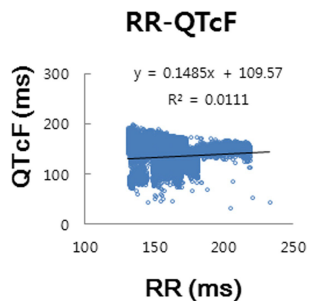

Pearson correlation coefficient 0.105  
 $p < 0.01$

**n = 14,491**

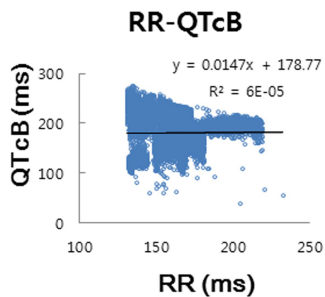

Pearson correlation coefficient 0.00765  
 $p = 0.357$
