# Supplementary figures and images for: Synthetic cannabinoid, JWH-030, induces QT prolongation through hERG channel inhibition
Source: Royal Society of Chemistry journal article supplement (doi:10.1039/c6tx00259e), 2016-01-01

## Supporting Information 2.

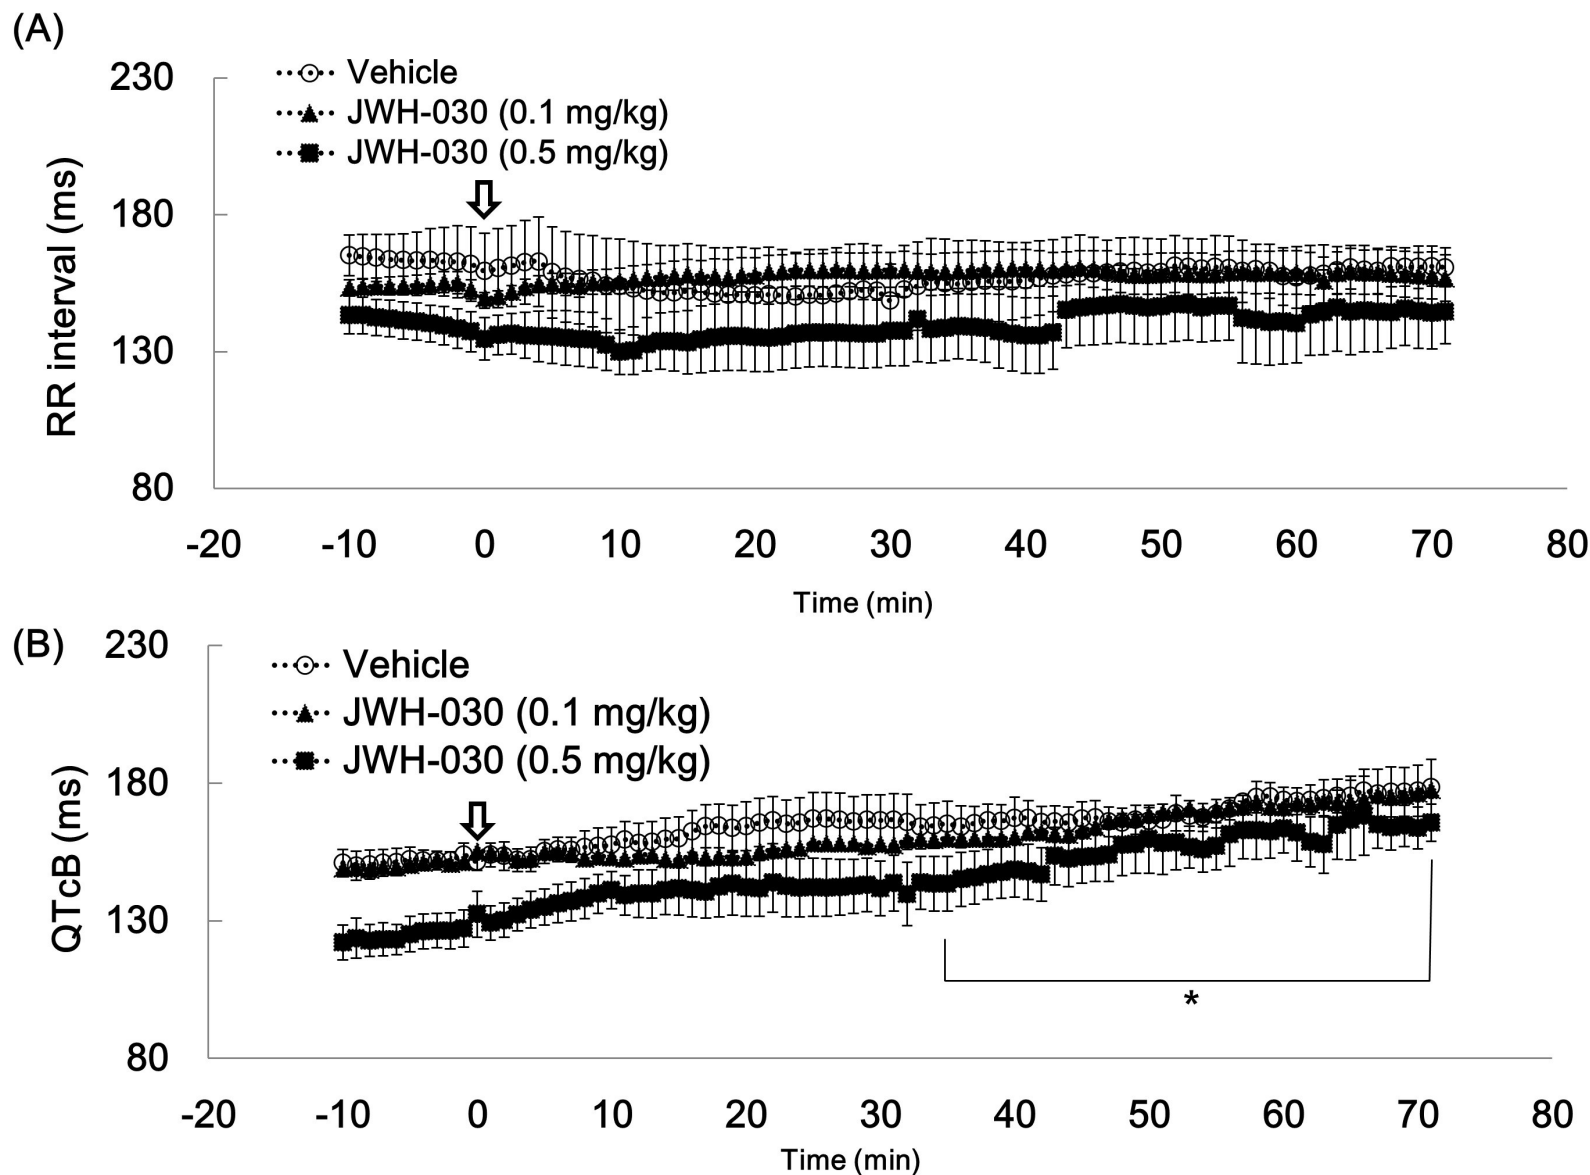

Supplement: c6tx00259e2.pdf [file c6tx00259e2.pdf]

Supporting Information 3.

E-4031

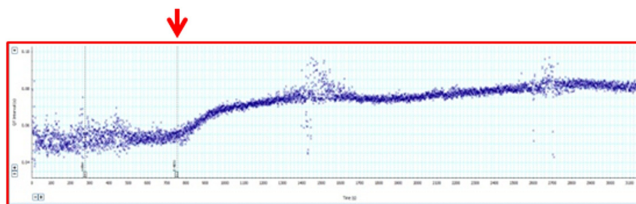

JWH-030

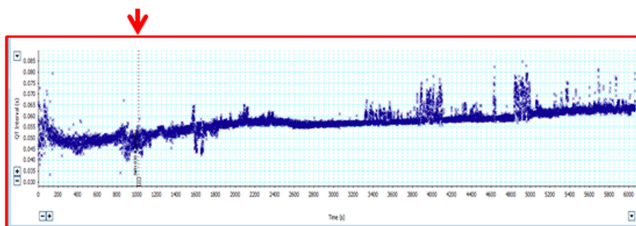

Vehicle

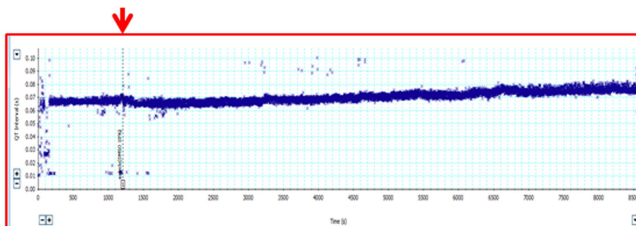

Supplement: c6tx00259e6.pdf [file c6tx00259e6.pdf]

Supporting Information 4.

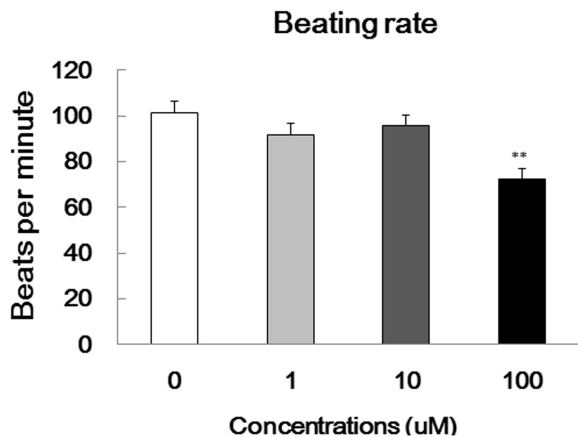

Supplement: c6tx00259e7.pdf [file c6tx00259e7.pdf]
